# Supplementary material for: An easy co-casting method to synthesize mesostructured carbon composites with high magnetic separability and acid resistance
Source: Royal Society of Chemistry journal article supplement (doi:10.1039/b906776k), 2009-01-01
Supplement: b906776k.pdf [file b906776k.pdf]

## Supplementary Information

### An easy co-casting method to synthesize mesostructured carbon composites with high magnetic separability and acid resistance

Limin Guo, Shaozhong Zeng, Jiangtian Li, Fangming Cui, Xiangzhi Cui, Wenbo Bu  
and Jianlin Shi<sup>\*</sup>

State Key Laboratory of High Performance Ceramics and Superfine Microstructure,  
Shanghai Institute of Ceramics, Chinese Academy of Sciences, 1295 Ding-xi Road,  
Shanghai 200050, People's Republic of China

<sup>\*</sup>Corresponding author. Tel.: +86-21-52412714; Fax: +86-21-52413122.  
E-mail address: jlshi@sunm.shcnc.ac.cn

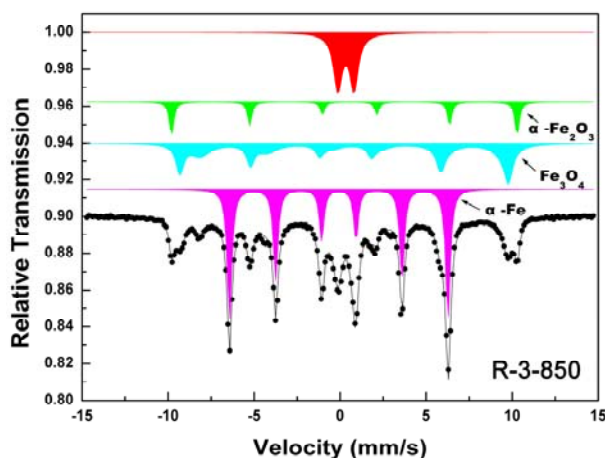

**Figure S1** Mössbauer spectrum of R-3-850 at room temperature

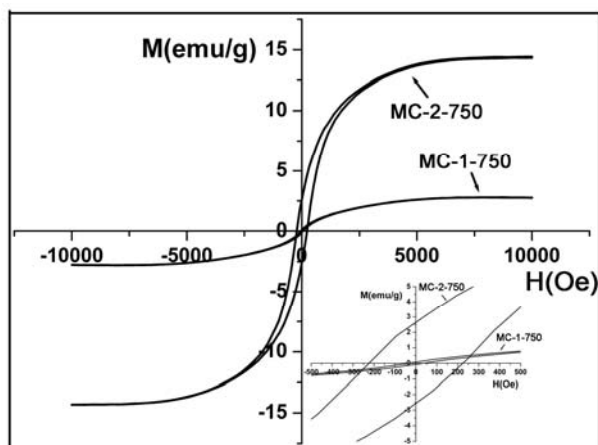

**Figure S2** Magnetization curves of the magnetic mesoporous carbon composites of MC-1-750 and MC-2-750

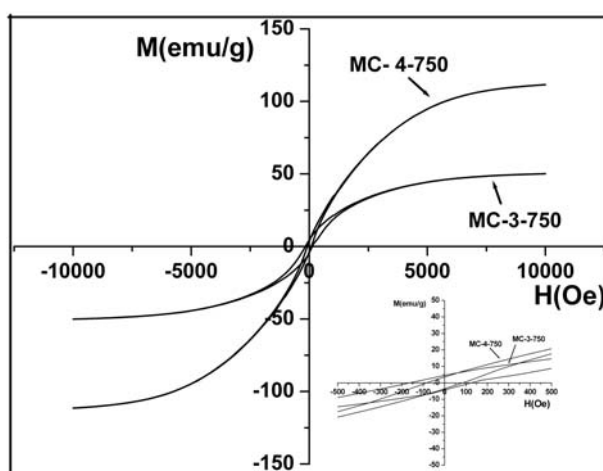

**Figure S3** Magnetization curves of the magnetic mesoporous carbon composites of MC-3-750 and MC-4-750
